# Supplementary material for: Dopamine and Norepinephrine Tissue Levels in the Developing Limbic Brain Are Impacted by the Human CHRNA6 3′-UTR Single-Nucleotide Polymorphism (rs2304297) in Rats
Source: MDPI journal article supplement (doi:10.3390/ijms25073676), 2024-03-26
Supplement: s1 [file s1]

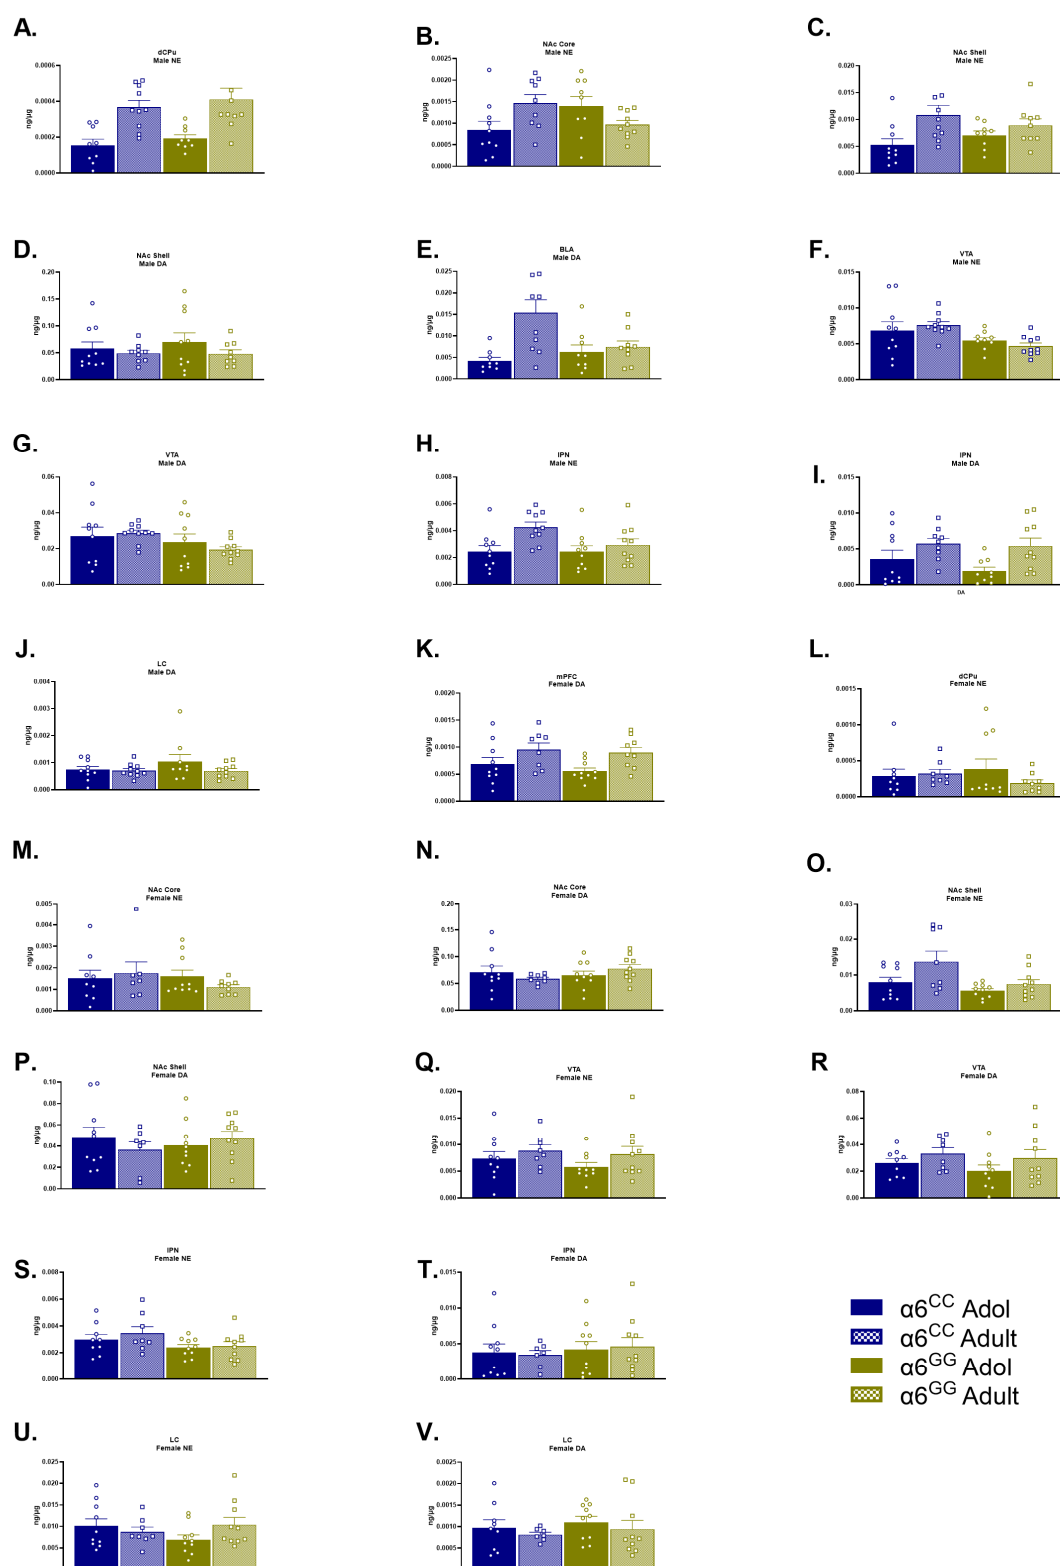

Supplemental Figure S1 **DA and NE in human *CHRNA6* 3'-UTR SNP knock-in in regions of the reward system. DA and NE Means  $\pm$  SEM in males (A-J) and females (H-V). dCPu = dorsal Caudate putamen, NAc = Nucleus accumbens (Shell and Core), VTA (Ventral tegmental area, IPN = Interpeduncular nucleus, LC = Locus coeruleus  $\alpha 6^{GG}$  vs  $\alpha 6^{CC}$  All data presented as mean  $\pm$  SEM. N=8-10/group.**

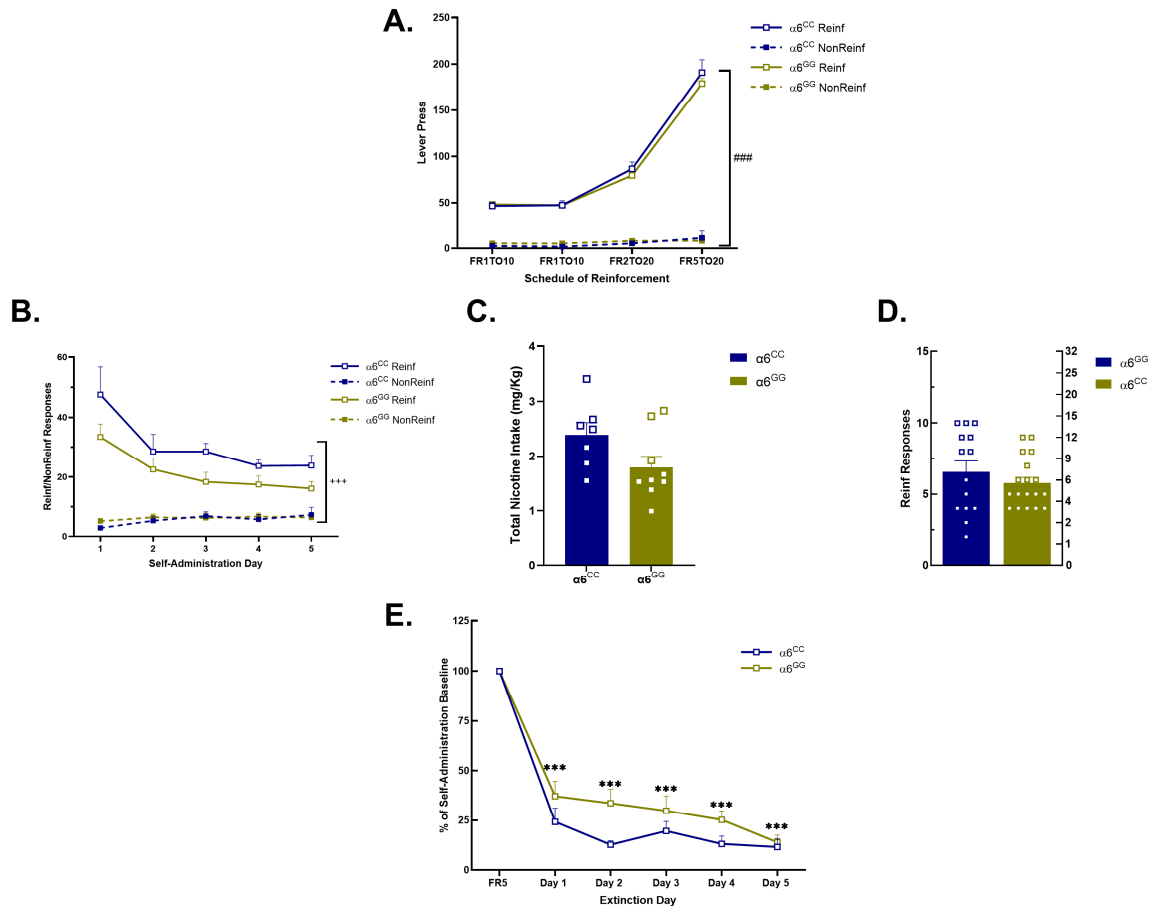

**Supplemental Figure S2 The human *CHRNA6* 3'-UTR SNP knock-in does not impact food self-administration, nicotine self-administration, nicotine intake, progressive ratio, and extinction in males.** (A) Males,  $\alpha 6^{GG}$  and  $\alpha 6^{CC}$ , mean daily 30 min responses  $\pm$  SEM for food self-administration at Fixed Ratio (FR)1 Time out (TO)1, FR1TO10, FR2TO20, and FR5TO20 schedules of reinforcement. ###p<0.0001 Reinforced (Rein) vs. Non-Reinforced (NonReinf) responses. N=7-9/group. (B) Males,  $\alpha 6^{GG}$  and  $\alpha 6^{CC}$ , mean daily 1-h responses  $\pm$  SEM for nicotine self-administration at FR5TO20 schedule of reinforcement. \*\*\*p<0.001 Rein vs. NonReinf. N=7-9/group. (C) Males,  $\alpha 6^{GG}$  and  $\alpha 6^{CC}$ , total nicotine intake and (D) progressive ratio. (E) After completion of nicotine self-administration, males,  $\alpha 6^{GG}$  and  $\alpha 6^{CC}$ , were allowed to respond to the Rein and NonReinf lever without schedule consequence (e.g. infusion of nicotine, cue light and tone). Data are presented as a mean  $\pm$  SEM percent of the last day of nicotine self-administration responding for the first five days. \*\*\*p<0.001 vs Last FR5. N=7-9/group.

**Supplemental Table S1 Summary of NE and DA in CHRNA6 3'-UTR SNP Knock-In Adolescent and Adult, Male and Female, Key Regions of the Reward Circuitry**

|          |    | Females         |       |                 |       | Males           |       |                 |       |
|----------|----|-----------------|-------|-----------------|-------|-----------------|-------|-----------------|-------|
|          |    | $\alpha 6^{CC}$ |       | $\alpha 6^{GG}$ |       | $\alpha 6^{CC}$ |       | $\alpha 6^{GG}$ |       |
|          |    | Adolescent      | Adult | Adolescent      | Adult | Adolescent      | Adult | Adolescent      | Adult |
| PFC      | DA |                 |       |                 |       |                 | ↑     | ↑               |       |
|          | NE | ↑               |       |                 | ↑     | ↑               |       | ↑               |       |
| CPu      | DA |                 |       |                 |       | ↑               |       |                 |       |
|          | NE |                 |       |                 | ↑     |                 |       |                 |       |
| NAc Core | DA |                 |       |                 |       |                 |       |                 |       |
|          | NE |                 |       |                 |       | ↑               |       | ↑               |       |
| BLA      | DA |                 |       |                 | ↑     | ↑               |       |                 |       |
|          | NE |                 |       |                 | ↑     |                 |       |                 |       |
| LC       | DA |                 |       |                 |       |                 |       | ↑               |       |
|          | NE |                 |       |                 |       |                 |       | ↑               |       |

Prefrontal cortex (PFC); Caudate Putamen (CPu); Nucleus Accumbens (NAc); Basolateral Amygdala (BLA); Locus Coeruleus (LC); Dopamine (DA); Norepinephrine (NE)

**Supplemental Table S2 DOPAC/DA and HVA/DA turnover in central regions of the reward system for naïve adolescent, adult and drug-seeking rats with the *CHRNA6* 3'UTR SNP.**

|           |          | $\alpha 6^{CC}$ |             |                    | $\alpha 6^{GG}$ |             |                   |
|-----------|----------|-----------------|-------------|--------------------|-----------------|-------------|-------------------|
|           |          | Adolescent      | Adult       | Reinstatement      | Adolescent      | Adult       | Reinstatement     |
| mPFC      | DOPAC/DA | 1.14 ± 0.27     | 1.35 ± 0.25 | 2.15 ± 0.28        | 1.02 ± 0.25     | 0.46 ± 0.27 | 0.99 ± 0.19       |
|           | HVA/DA   | 0.63 ± 0.13     | 0.45 ± 0.12 | 3.81 ± 1.57***++   | 0.65 ± 0.13     | 0.6 ± 0.12  | 2.86 ± 1.06**     |
| dCPu      | DOPAC/DA | 0.24 ± 0.02     | 0.16 ± 0.02 | 0.17 ± 0.01*       | 0.18 ± 0.02     | 0.14 ± 0.02 | 0.14 ± 0.01       |
|           | HVA/DA   | 0.05 ± 0.01     | 0.07 ± 0.01 | 0.03 ± 0.01++      | 0.04 ± 0.01     | 0.07 ± 0.01 | 0.04 ± 0.00++     |
| NAc Core  | DOPAC/DA | 0.33 ± 0.02     | 0.28 ± 0.02 | 0.29 ± 0.03        | 0.2 ± 0.02      | 0.24 ± 0.02 | 0.25 ± 0.02       |
|           | HVA/DA   | 0.04 ± 0.01     | 0.09 ± 0.01 | 0.07 ± 0.01        | 0.03 ± 0.01     | 0.11 ± 0.01 | 0.06 ± 0.01++     |
| NAc Shell | DOPAC/DA | 0.2 ± 0.02      | 0.15 ± 0.02 | 0.27 ± 0.03+++     | 0.16 ± 0.02     | 0.14 ± 0.02 | 0.23 ± 0.02*++    |
|           | HVA/DA   | 0.03 ± 0.01     | 0.04 ± 0.01 | 0.15 ± 0.11        | 0.05 ± 0.01     | 0.04 ± 0.01 | 0.29 ± 0.07***+++ |
| BLA       | DOPAC/DA | 0.39 ± 0.04     | 0.15 ± 0.04 | 0.29 ± 0.06        | 0.26 ± 0.04     | 0.14 ± 0.04 | 0.21 ± 0.04       |
|           | HVA/DA   | 0.14 ± 0.03     | 0.06 ± 0.03 | 0.31 ± 0.15        | 0.14 ± 0.03     | 0.1 ± 0.03  | 0.35 ± 0.10++     |
| VTA       | DOPAC/DA | 0.39 ± 0.03     | 0.31 ± 0.03 | 0.24 ± 0.09        | 0.35 ± 0.03     | 0.28 ± 0.03 | 0.22 ± 0.06*      |
|           | HVA/DA   | 0.08 ± 0.02     | 0.1 ± 0.02  | 0.3 ± 0.33         | 0.13 ± 0.02     | 0.11 ± 0.02 | 0.62 ± 0.20***+++ |
| IPN       | DOPAC/DA | 1.27 ± 0.18     | 0.63 ± 0.19 | 12.95 ± 3.53***+++ | 0.95 ± 0.19     | 0.48 ± 0.18 | 2.57 ± 1.66       |
|           | HVA/DA   | 1.22 ± 0.32     | 0.25 ± 0.33 | 5.27 ± 1.82***+++  | 1.06 ± 0.32     | 0.38 ± 0.32 | 2.24 ± 0.86+      |
| LC        | DOPAC/DA | 1.47 ± 0.54     | 3.89 ± 0.51 | 2.45 ± 1.50        | 1.17 ± 0.51     | 1.72 ± 0.54 | 3.16 ± 0.92       |
|           | HVA/DA   | 1.08 ± 0.40     | 0.56 ± 0.40 | 5.27 ± 3.17+       | 1.16 ± 0.40     | 0.91 ± 0.40 | 6.86 ± 1.94***+++ |

Prefrontal cortex (PFC); Caudate Putamen (CPu); Nucleus Accumbens (NAc); Basolateral Amygdala (BLA); Locus Coeruleus (LC); Dopamine (DA); Norepinephrine (NE); 3,4-Dihydroxyphenylacetic acid (DOPAC); Homovanillic acid (HVA)

\*p<0.05, \*\*p<0.01, \*\*\*p<0.001 vs naïve adolescents; +p<0.05, ++p<0.01, +++p<0.001 vs naïve adults.
